# Supplementary material
Source: PubMed Central journal article supplement (PMC3322739)
Supplement: supp_00168.2011_suppfigs.pdf [file supp_00168.2011_suppfigs.pdf]

## Optical-Fiber Based Fluorescence Detection System

An optical fiber based fluorescence detection system was developed to measure the concentration of FITC-BSA in the abluminal chamber in real-time. This cost-effective and compact system used a light emitting diode (LED) as excitation light source and an ultra sensitive photodiode as photon detector. The design was based on similar systems used in previous studies as described by Novak et al. (24), DeMaio et al. (9), Yang et al. (34) and in (26).

Fig. S6 is the schematic of the light path. Excitation lights from a high power blue LED (MBLED, peak wave length 470 nm, 625 mW, Thorlabs) were collimated by a plano-convex lens ( $f=25.4$  mm, surface coated for 350-650 nm wavelength light transmission, Thorlabs). Blue excitation light was then filtered by a narrow bandpass filter (470 nm/10 nm, central wavelength/ full width at half maximum, Thorlabs), and reflected by a long pass dichroic mirror (Q505LP, Chroma) placed at 45 degree to the light path. Excitation light was finally focused by another plano-convex lens ( $f=25.4$  mm, Thorlabs) to one end of the polymer clad multimode silica fiber (numerical aperture 0.48, 1 mm core diameter, Thorlabs). The other end, the measurement end, of the optical fiber was immersed in the abluminal solution. Both ends of the fiber were polished by 5  $\mu\text{m}$ , 3  $\mu\text{m}$  and 1  $\mu\text{m}$  aluminum oxide polishing sheet (Thorlabs) sequentially to achieve the best transmission efficiency.

The emitted fluorescence light was collected by the same optical fiber and collimated by the same lens. The fluorescence light passed through the dichroic mirror, filtered by an emitter filter (530 nm/ 10 nm, Thorlabs) and was finally focused by another

plano-convex lens ( $f=25.4$  mm, Thorlabs) to the sensor of an ultra-sensitive femtowatt photoreceiver (PDF10A, Thorlabs). The photoreceiver combines a low noise silicon photodiode with a built-in ultra low noise transimpedance amplifier with a high gain of  $10^{12}$  V/A. All the optical components were enclosed in lens tubes (Thorlabs) and a mirror holder was used to secure the dichroic mirror precisely at the 45 degree position. Thus, the entire optical path, except for the measurement end of the fiber, was shielded from stray light. The controllers of the LED and photoreceiver were connected to a DAQ board (NI PCI-6221, National Instruments) through BNC cables. The LED was turned on only during the measurement time to minimize photo bleaching. The output of the LED was controlled by a rectangular voltage signal at 20 Hz generated by the DAQ. The average excitation intensity can be modulated by altering either the duty cycle or peak voltage of the control signal. The DC voltage output from the photoreceiver was also transmitted to the computer via the DAQ board. A LabView (National Instruments) program was used for the LED control and data acquisition.

To increase the detection sensitivity and minimize the noise from stray light that enters the measurement end of the fiber, a virtual lock-in amplifier was implemented in the LabView program (1). The fluorescence signal had a frequency of 20 Hz due to the frequency of the excitation lights. An internal sinusoidal waveform of 20 Hz was generated virtually in the LabView program. The virtual lock-in amplifier then acted as a narrow bandpass filter around the reference signal frequency, thus only amplifying the signal at 20 Hz. The fluorescence measurement can be performed inside a conventional cell incubator without the effect of the ambient light. During each measurement cycle,

the LED was turned on for only 6 seconds. Two seconds after the LED was switched on and when the LED output was stable, the fluorescence signal was acquired for 4 seconds. Fluorescence measurements were fully automated, and the tracer concentration can be measured every minute to obtain  $\Delta C_s/\Delta t$  for the permeability calculation.

Fig. S7 shows the measurements of a series dilution of FITC-BSA solution from 100 ng/ml to 1  $\mu$ g/ml using three different excitation intensities. The peak voltages of the LED control signal were set to 0.5, 1.0 and 1.5V, respectively. The detection system demonstrated a good sensitivity and the R values of the linear regressions are greater than 0.998. Although 1.5V offered the best linearity and sensitivity, the high excitation intensity can lead to greater photobleaching and fluorescence signal saturation at lower concentrations, which limits the dynamic range of the measurements. Thus, the voltage of 1.0 V was used to control the LED output in the following experiments.

**Figure S1**

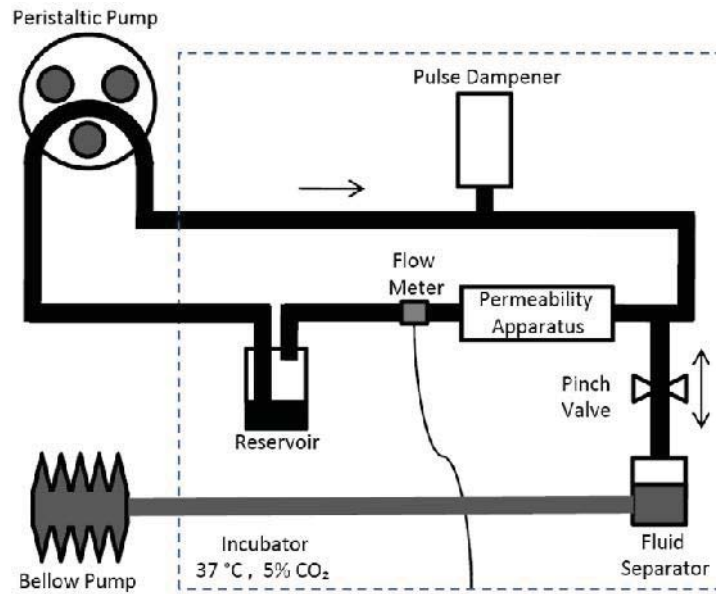

**Figure S1:** Schematic of the flow circuit for permeability measurement.

**Figure S2**

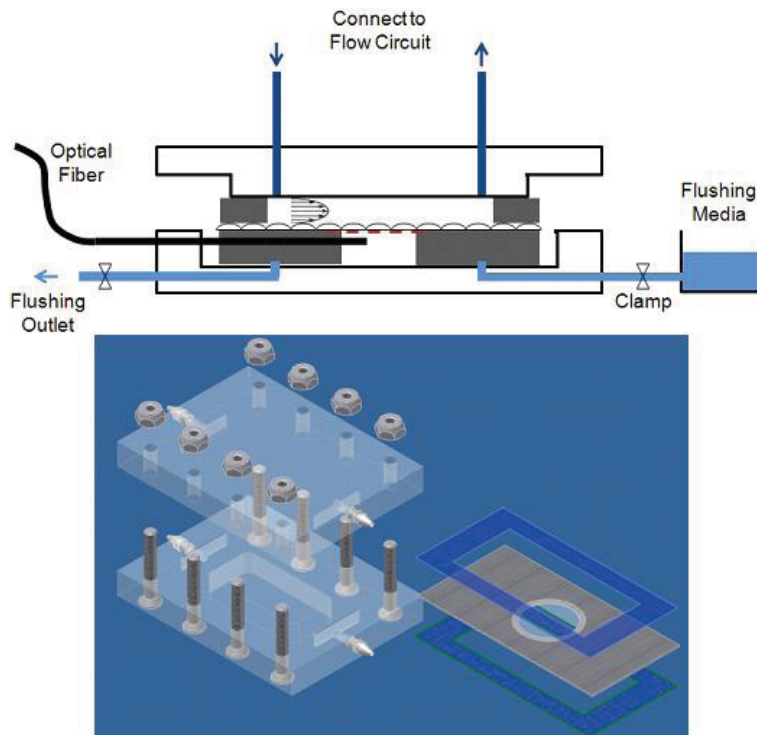

**Figure S2:** Schematic and 3D design of the permeability apparatus

**Figure S3**

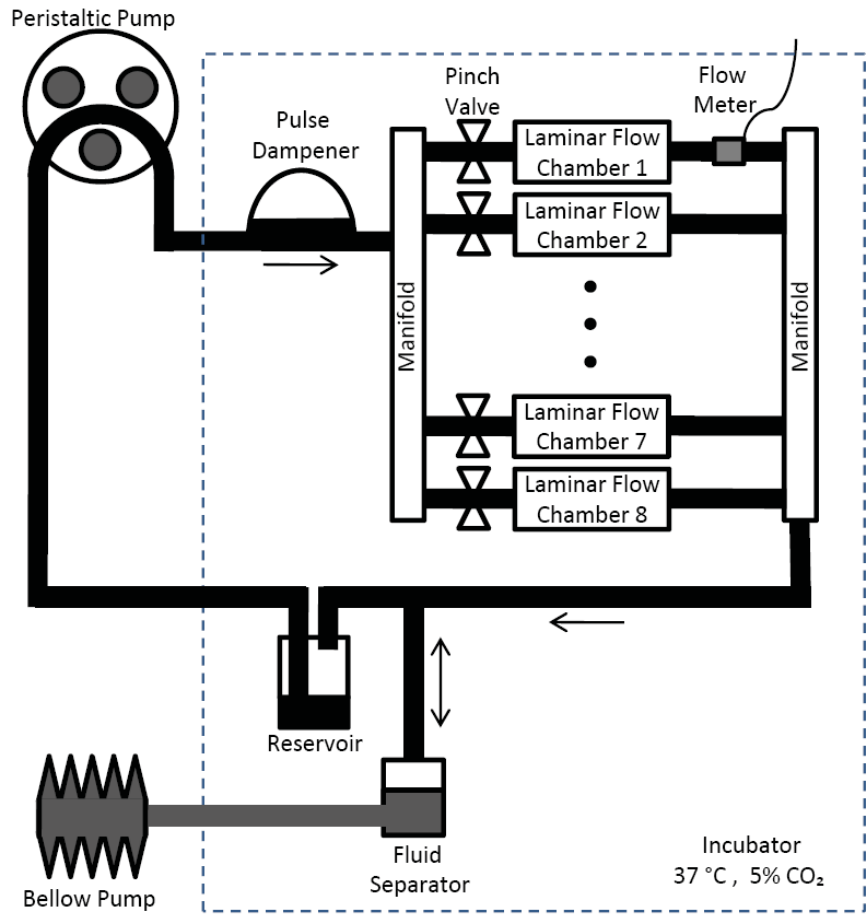

**Figure S3:** Schematic of flow circuit for transcriptional studies.

**Figure S4**

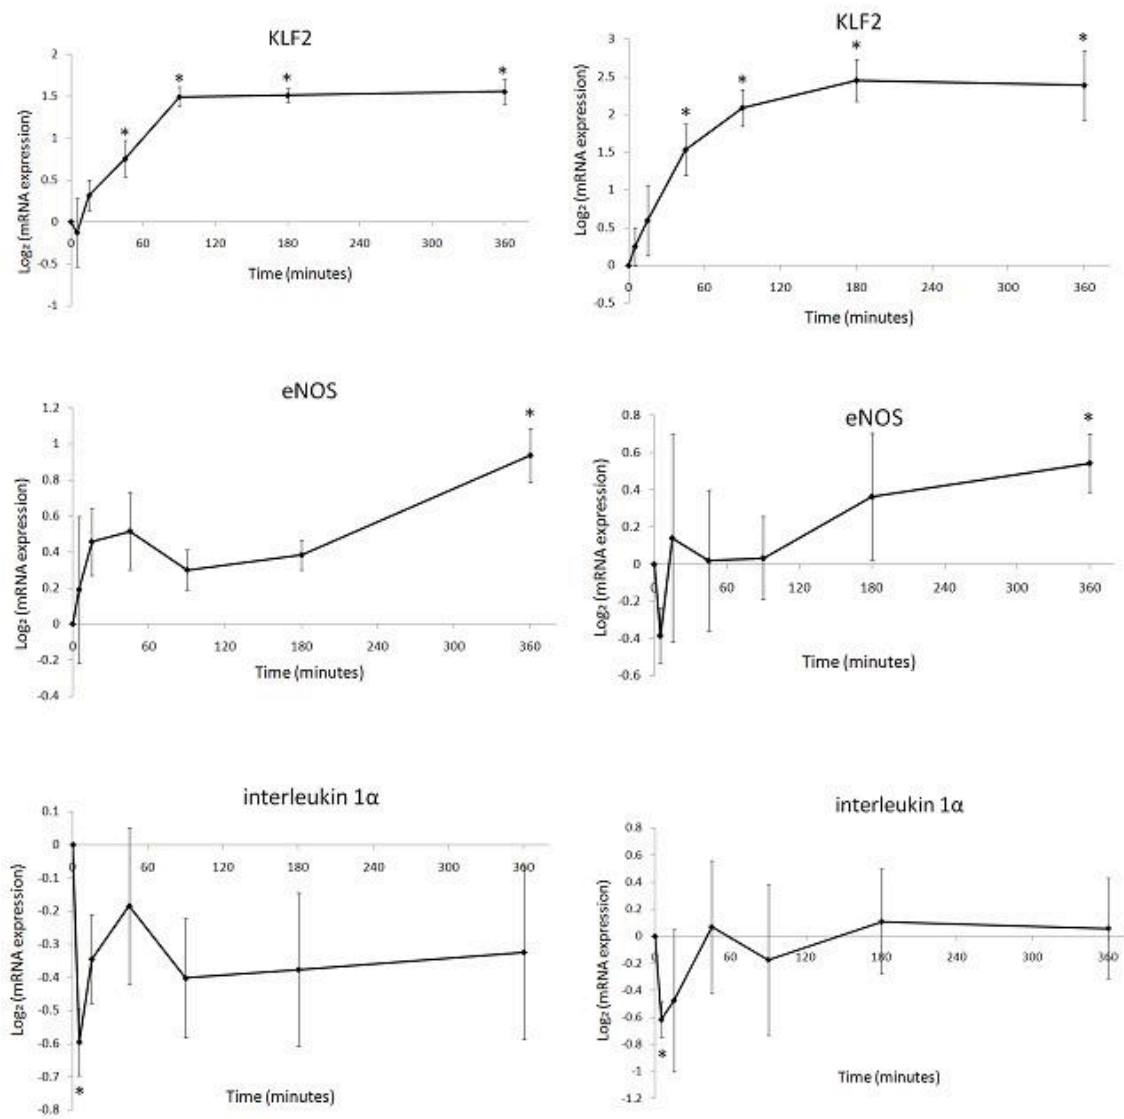

**Figure S4:** Real-time PCR validates the microarray results of the magnitude step-up experiments. Left: microarray measurements; Right: real-time PCR measurements. n=4 for each data point. Expression values were normalized by the pre step-up controls, and error bars indicates the standard error of the mean. \*: p<0.05, one-way t-test against zero.

**Figure S5**

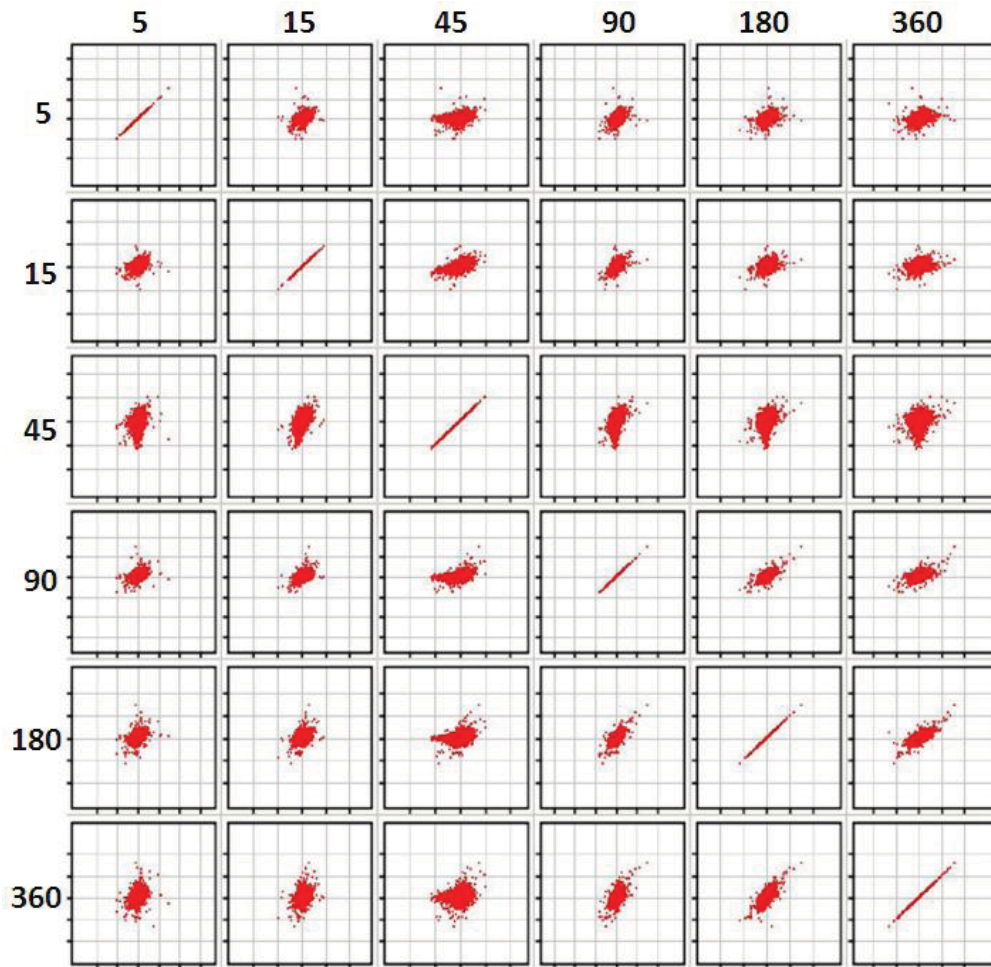

**Figure S5:** Matrix of scatter plots to compare the global expression profiles between different time points. Each panel compares transcriptional profile between two time points. Each gene is plotted as one data point, where x-axis is the expression value at one time point and y-axis is the expression value at the other time point.

Figure S6

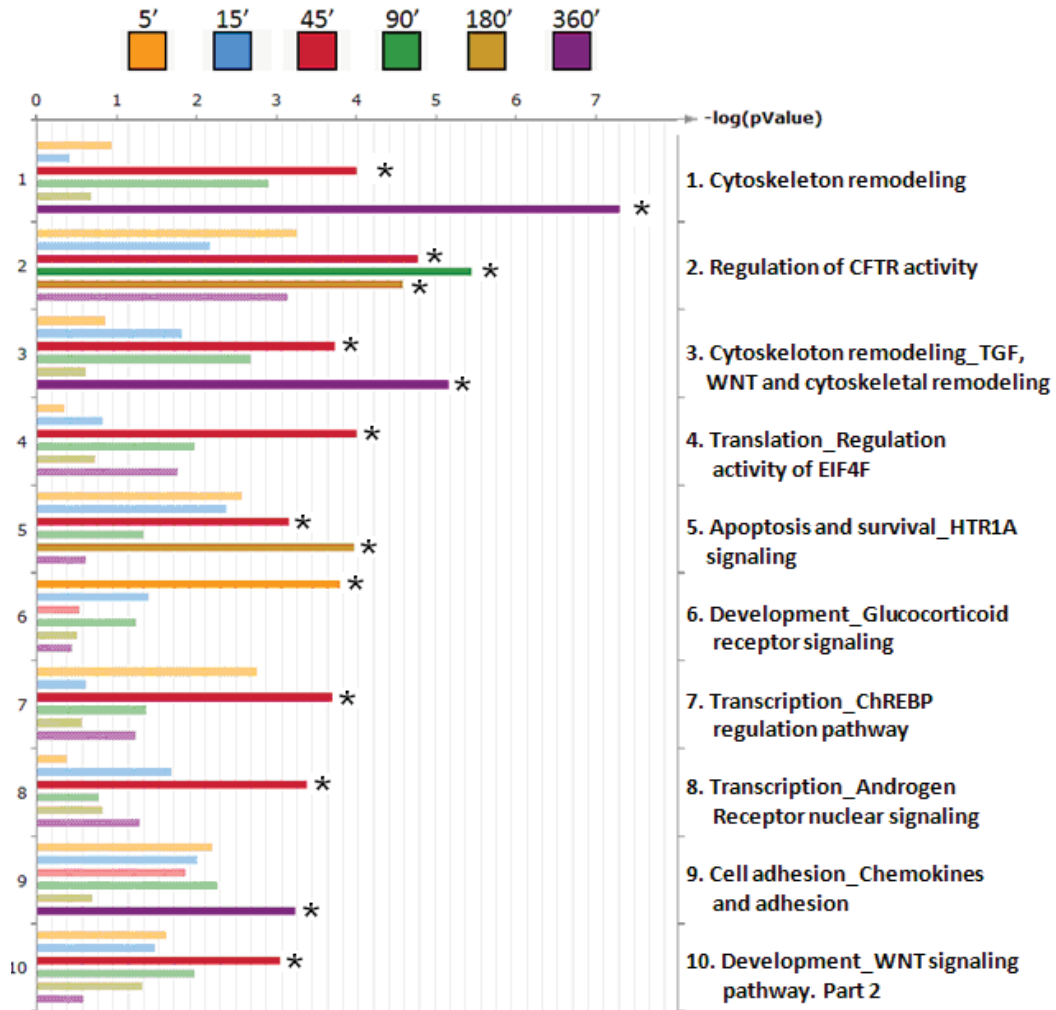

Figure S6: GeneGo identified pathways that are sensitive to the elevated shear stress magnitude. Top ten canonical pathways were listed. \* indicates the false discovery rate < 5%.



**Figure S7**

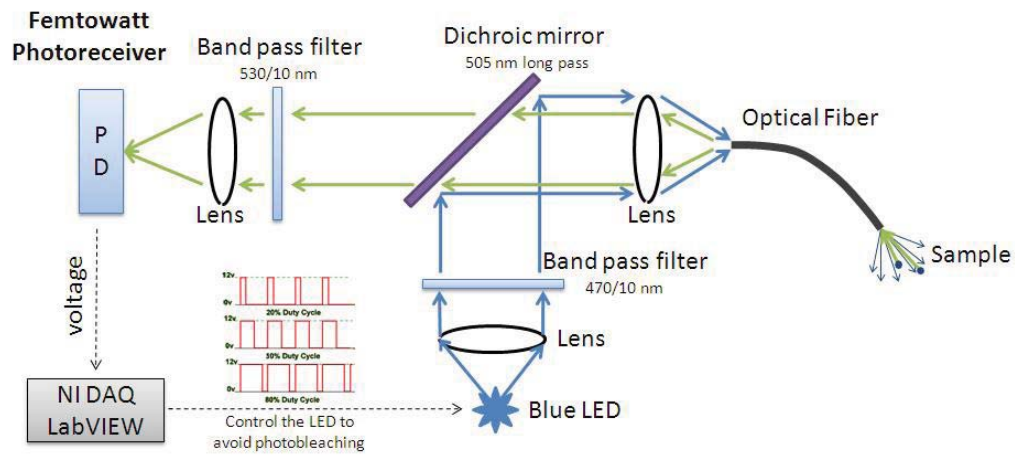

**Figure S7:** Schematic of the light path of the fluorescence detection system.

**Figure S8**

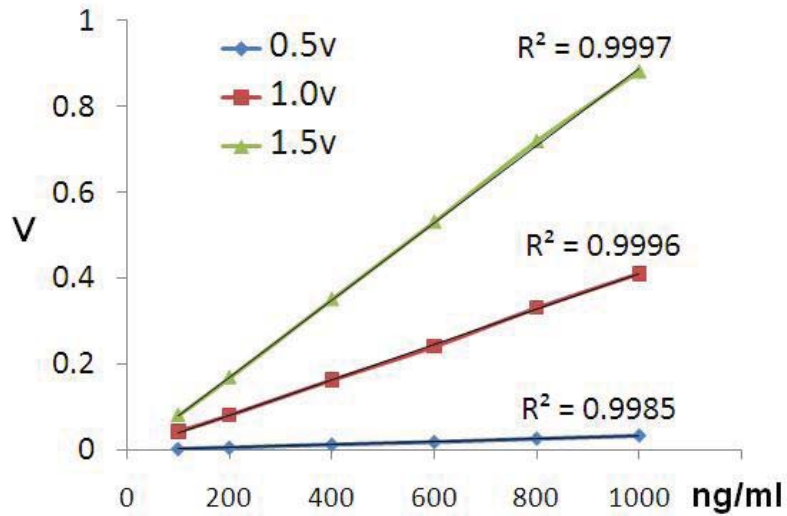

**Figure S8:** Measurement of a series dilution of FITC-BSA solution. X: concentrations of the FITC-BSA solution. Y: output voltages of the fluorescence detector. Excitation lights at three different intensity levels were generated by applying different driving voltage to the LED.

**Table S1: Primers for real-time quantitative-PCR**

| Gene                                    | 3' Primer                        | 5' Primer                        |
|-----------------------------------------|----------------------------------|----------------------------------|
| <b>GAPDH</b>                            | 5'-GTC TTC TGG GTG GCA GTG AT-3' | 5'-GGG CAT GAA CCA TGA GAA GT-3' |
| <b>eNOS</b>                             | 5'-AGC ACA GC AGG TTG ATT TC-3'  | 5'-GGC TGG TAC ATG AGC ACA GA-3' |
| <b>KLF2</b>                             | 5'-CAA AAT GCC ACC TGT CTT CC-3' | 5'-AGC CCA CCG GGT CTA CAC TA-3' |
| <b>Interleukin-1<math>\alpha</math></b> | 5'-CAT CAT TCA GGA TGC ACT GG-3' | 5'-CAA GGA CAG TGT GGT GAT GG-3' |

**Table S2: List of genes identified at different time points after shear step-up at false discovery rate controlled at 10%. The expression values were normalized to the pre step-up controls, and were presented in log2 scale.**

| ID                | Gene     | Expression | Description                                                                            |
|-------------------|----------|------------|----------------------------------------------------------------------------------------|
| <b>5 minutes</b>  |          |            |                                                                                        |
| SS00010196        | IL1A     | -0.60      | interleukin 1, alpha                                                                   |
| SS00010211        |          | -0.41      |                                                                                        |
| <b>15 minutes</b> |          |            |                                                                                        |
| SS00003206        | ZFP106   | 0.59       | zinc finger protein 106 homolog (mouse)                                                |
| SS00003440        | ACTC     | 0.45       | actin, alpha, cardiac muscle                                                           |
| SS00010237        |          | 0.33       |                                                                                        |
| <b>45 minutes</b> |          |            |                                                                                        |
| SS00009868        | MYH9     | 1.00       | myosin, heavy polypeptide 9, non-muscle                                                |
| SS00000396        | CCAR1    | 0.69       | cell division cycle and apoptosis regulator 1                                          |
| SS00007343        | LMNB1    | 0.53       | lamin B1                                                                               |
| SS00009180        | PCDH7    | 0.53       | BH-protocadherin (brain-heart)                                                         |
| SS00008997        | YAF2     | 0.51       | YY1 associated factor 2                                                                |
| SS00006138        | C3ORF17  | 0.49       | Chromosome 3 open reading frame 17                                                     |
| SS00008956        |          | 0.48       |                                                                                        |
| SS00001082        | SCAMP1   | 0.40       | secretory carrier membrane protein 1                                                   |
| SS00004979        | KIAA1279 | 0.37       | KIAA1279                                                                               |
| <b>90 minutes</b> |          |            |                                                                                        |
| SS00000203        | KLF2     | 1.50       | Kruppel-like factor 2 (lung)                                                           |
| SS00006925        | ID1      | 1.13       | inhibitor of DNA binding 1, dominant negative helix-loop-helix protein                 |
| SS00004771        | GADD45B  | 0.98       | growth arrest and DNA-damage-inducible, beta                                           |
| SS00007520        | KLF4     | 0.92       | Kruppel-like factor 4 (gut)                                                            |
| SS00007619        | ID2      | 0.79       | inhibitor of DNA binding 2, dominant negative helix-loop-helix protein                 |
| SS00006583        | COL4A1   | 0.60       | collagen, type IV, alpha 1                                                             |
| SS00003206        | ZFP106   | 0.60       | zinc finger protein 106 homolog (mouse)                                                |
| SS00009712        | TIMP3    | 0.58       | tissue inhibitor of metalloproteinase 3 (Sorsby fundus dystrophy, pseudo-inflammatory) |
| SS00000220        | ID2      | 0.57       | inhibitor of DNA binding 2, dominant negative helix-loop-helix protein                 |
| SS00003201        | LOC51136 | 0.54       | PTD016 protein                                                                         |

|                    |           |       |                                                                                           |
|--------------------|-----------|-------|-------------------------------------------------------------------------------------------|
| SS00008254         | BHLHB2    | 0.54  | basic helix-loop-helix domain containing, class B, 2                                      |
| SS00010237         |           | 0.44  |                                                                                           |
| SS00007441         | KLF10     | 0.43  | Kruppel-like factor 10                                                                    |
| SS00001410         | ID3       | 0.42  | inhibitor of DNA binding 3, dominant negative helix-loop-helix protein                    |
| SS00007031         | SGK       | 0.41  | serum/glucocorticoid regulated kinase                                                     |
| SS00000868         | PTTG1     | 0.40  | pituitary tumor-transforming 1                                                            |
| SS00004979         | KIAA1279  | 0.39  | KIAA1279                                                                                  |
| SS00009988         | TRPC3     | 0.35  | transient receptor potential cation channel, subfamily C, member 3                        |
| SS00001680         | CD83      | 0.32  | CD83 antigen (activated B lymphocytes, immunoglobulin superfamily)                        |
| <b>180 minutes</b> |           |       |                                                                                           |
| SS00000203         | KLF2      | 1.51  | Kruppel-like factor 2 (lung)                                                              |
| SS00007520         | KLF4      | 1.17  | Kruppel-like factor 4 (gut)                                                               |
| SS00006925         | ID1       | 0.99  | inhibitor of DNA binding 1, dominant negative helix-loop-helix protein                    |
| SS00007619         | ID2       | 0.87  | inhibitor of DNA binding 2, dominant negative helix-loop-helix protein                    |
| SS00009975         | KCNN4     | 0.79  | potassium intermediate/small conductance calcium-activated channel, subfamily N, member 4 |
| SS00003184         | WASL      | 0.75  | Wiskott-Aldrich syndrome-like                                                             |
| SS00006914         | DSIPI     | 0.75  | delta sleep inducing peptide, immunoreactor                                               |
| SS00000220         | ID2       | 0.72  | inhibitor of DNA binding 2, dominant negative helix-loop-helix protein                    |
| SS00005051         | LOC401137 | 0.63  | hypothetical LOC401137                                                                    |
| SS00008118         | STK38L    | 0.63  | serine/threonine kinase 38 like                                                           |
| SS00007835         | LOC401137 | 0.54  | hypothetical LOC401137                                                                    |
| SS00009553         | TEK       | 0.52  | TEK tyrosine kinase, endothelial (venous malformations, multiple cutaneous and mucosal)   |
| SS00000205         | FAM26B    | 0.50  | family with sequence similarity 26, member B                                              |
| SS00000537         | GJA4      | 0.46  | gap junction protein, alpha 4, 37kDa (connexin 37)                                        |
| SS00000587         | HMOX1     | 0.45  | heme oxygenase (decycling) 1                                                              |
| SS00001680         | CD83      | 0.39  | CD83 antigen (activated B lymphocytes, immunoglobulin superfamily)                        |
| SS00007712         |           | 0.37  |                                                                                           |
| SS00008566         | YWHAH     | 0.35  | tyrosine 3-monooxygenase/tryptophan 5-monooxygenase activation protein, eta polypeptide   |
| SS00009439         |           | 0.35  |                                                                                           |
| SS00006985         | DOK4      | 0.26  | docking protein 4                                                                         |
| SS00001142         | KIT       | -0.33 | v-kit Hardy-Zuckerman 4 feline sarcoma viral oncogene homolog                             |
| SS00003482         | TTC5      | -0.36 | tetratricopeptide repeat domain 5                                                         |
| SS00007051         |           | -0.41 |                                                                                           |
| SS00004185         | RGS2      | -0.69 | regulator of G-protein signalling 2, 24kDa                                                |
| SS00001048         | HLA-A     | -0.69 | major histocompatibility complex, class I, A                                              |
| SS00005446         | CXCR4     | -0.77 | chemokine (C-X-C motif) receptor 4                                                        |
| SS00002290         | CXCR4     | -0.81 | chemokine (C-X-C motif) receptor 4                                                        |
| <b>360 minutes</b> |           |       |                                                                                           |
| SS00000203         | KLF2      | 1.56  | Kruppel-like factor 2 (lung)                                                              |
| SS00006925         | ID1       | 1.36  | inhibitor of DNA binding 1, dominant negative helix-loop-helix protein                    |

|            |           |      |                                                                                           |
|------------|-----------|------|-------------------------------------------------------------------------------------------|
| SS00007520 | KLF4      | 1.30 | Kruppel-like factor 4 (gut)                                                               |
| SS00009782 | HTR2B     | 1.22 | 5-hydroxytryptamine (serotonin) receptor 2B                                               |
| SS00009975 | KCNN4     | 1.16 | potassium intermediate/small conductance calcium-activated channel, subfamily N, member 4 |
| SS00007619 | ID2       | 1.08 | inhibitor of DNA binding 2, dominant negative helix-loop-helix protein                    |
| SS00000510 | NOS3      | 0.94 | nitric oxide synthase 3 (endothelial cell)                                                |
| SS00009004 | 13CDNA73  | 0.90 | hypothetical protein CG003                                                                |
| SS00006583 | COL4A1    | 0.86 | collagen, type IV, alpha 1                                                                |
| SS00000220 | ID2       | 0.85 | inhibitor of DNA binding 2, dominant negative helix-loop-helix protein                    |
| SS00000587 | HMOX1     | 0.77 | heme oxygenase (decycling) 1                                                              |
| SS00001573 | NPR1      | 0.77 | natriuretic peptide receptor A/guanylate cyclase A (atriuretic peptide receptor A)        |
| SS00007009 | LOC57228  | 0.77 | hypothetical protein from clone 643                                                       |
| SS00006949 | EMILIN2   | 0.75 | elastin microfibril interfacier 2                                                         |
| SS00006914 | DSIPI     | 0.72 | delta sleep inducing peptide, immunoreactor                                               |
| SS00005801 | HYAL2     | 0.68 | hyaluronoglucosaminidase 2                                                                |
| SS00007835 | LOC401137 | 0.67 | hypothetical LOC401137                                                                    |
| SS00009553 | TEK       | 0.67 | TEK tyrosine kinase, endothelial (venous malformations, multiple cutaneous and mucosal)   |
| SS00009312 |           | 0.66 |                                                                                           |
| SS00000205 | FAM26B    | 0.65 | family with sequence similarity 26, member B                                              |
| SS00009154 |           | 0.64 |                                                                                           |
| SS00003980 | UPK3A     | 0.63 | uroplakin 3A                                                                              |
| SS00007236 | FGFR3     | 0.60 | fibroblast growth factor receptor 3 (achondroplasia, thanatophoric dwarfism)              |
| SS00004694 | PLEK2     | 0.60 | pleckstrin 2                                                                              |
| SS00005554 | LOC401137 | 0.60 | hypothetical LOC401137                                                                    |
| SS00000499 | DSTN      | 0.59 | destrin (actin depolymerizing factor)                                                     |
| SS00008566 | YWHAH     | 0.58 | tyrosine 3-monooxygenase/tryptophan 5-monooxygenase activation protein, eta polypeptide   |
| SS00000227 | CXXC5     | 0.58 | CXXC finger 5                                                                             |
| SS00001921 | SLC9A3R2  | 0.57 | solute carrier family 9 (sodium/hydrogen exchanger), isoform 3 regulatory factor 2        |
| SS00008590 |           | 0.55 |                                                                                           |
| SS00008418 | RAI17     | 0.55 | retinoic acid induced 17                                                                  |
| SS00006985 | DOK4      | 0.53 | docking protein 4                                                                         |
| SS00007163 | TMEPAI    | 0.53 | transmembrane, prostate androgen induced RNA                                              |
| SS00003206 | ZFP106    | 0.52 | zinc finger protein 106 homolog (mouse)                                                   |
| SS00010071 | FAM26B    | 0.52 | family with sequence similarity 26, member B                                              |
| SS00009566 | CLOCK     | 0.52 | clock homolog (mouse)                                                                     |
| SS00010488 | C10ORF45  | 0.52 | chromosome 10 open reading frame 45                                                       |
| SS00005569 | PSAT1     | 0.51 | phosphoserine aminotransferase 1                                                          |
| SS00000439 |           | 0.50 |                                                                                           |
| SS00008883 | SHCBP1    | 0.47 | likely ortholog of mouse Shc SH2-domain binding protein 1                                 |
| SS00002193 | PSPH      | 0.46 | phosphoserine phosphatase                                                                 |
| SS00008822 | ETS2      | 0.45 | v-ets erythroblastosis virus E26 oncogene homolog 2                                       |

|            |           |       |                                                               |
|------------|-----------|-------|---------------------------------------------------------------|
|            |           |       | (avian)                                                       |
| SS00000711 | PLK1      | 0.44  | polo-like kinase 1 (Drosophila)                               |
| SS00003556 | COBLL1    | 0.43  | COBL-like 1                                                   |
| SS00002036 | AK1       | 0.43  | adenylate kinase 1                                            |
| SS00009158 | LOC401137 | 0.42  | hypothetical LOC401137                                        |
| SS00007829 | RAMP2     | 0.42  | receptor (calcitonin) activity modifying protein 2            |
| SS00000616 | TOP2A     | 0.34  | topoisomerase (DNA) II alpha 170kDa                           |
| SS00000501 | DCN       | -0.57 | decorin                                                       |
| SS00001142 | KIT       | -0.67 | v-kit Hardy-Zuckerman 4 feline sarcoma viral oncogene homolog |
| SS00002946 | AREG      | -0.85 | amphiregulin (schwannoma-derived growth factor)               |
| SS00005446 | CXCR4     | -0.88 | chemokine (C-X-C motif) receptor 4                            |
| SS00002290 | CXCR4     | -0.91 | chemokine (C-X-C motif) receptor 4                            |
| SS00004185 | RGS2      | -0.93 | regulator of G-protein signalling 2, 24kDa                    |

**Table S3: The expression of *a-priori* selected genes in response to the elevated shear stress. Red: p<0.05; blue: p<0.1. The expression values after shear step-up were normalized to the pre step-up (preconditioned) controls. The expression of preconditioned cells were normalized to the static cells. Literature discussing the function and shear response of each selected gene is cited in the table. LSS: laminar shear stress, DSS: disturbed shear stress.**

|                                        | Preconditioned cells<br>(normalized to static cells)                                | During adaptation (normalized to preconditioned cells) |              |              |              |              |              |
|----------------------------------------|-------------------------------------------------------------------------------------|--------------------------------------------------------|--------------|--------------|--------------|--------------|--------------|
|                                        |                                                                                     | 5                                                      | 15           | 45           | 90           | 180          | 360          |
| <b>Inflammatory and adhesion genes</b> |                                                                                     |                                                        |              |              |              |              |              |
| <b>ICAM1</b>                           | <b>-0.50</b>                                                                        | <b>-0.12</b>                                           | <b>0.01</b>  | <b>0.10</b>  | <b>-0.03</b> | <b>0.01</b>  | <b>0.17</b>  |
|                                        | Inflammatory adhesion molecule (12, 14, 17, 20). LSS: ↓ (3).                        |                                                        |              |              |              |              |              |
| <b>VCAM1</b>                           | <b>-1.98</b>                                                                        | <b>0.00</b>                                            | <b>0.14</b>  | <b>0.07</b>  | <b>-0.19</b> | <b>-0.32</b> | <b>-0.31</b> |
|                                        | Inflammatory adhesion molecule (12, 14, 17, 20). LSS: ↓ (3, 8); DSS: ↑ (3)          |                                                        |              |              |              |              |              |
| <b>CCL2</b>                            | <b>1.18</b>                                                                         | <b>-0.21</b>                                           | <b>0.15</b>  | <b>-0.02</b> | <b>0.01</b>  | <b>-0.01</b> | <b>0.23</b>  |
|                                        | MCP1, Inflammatory molecule (14, 17, 20). LSS: ↓(3, 21) or biphasic(28); DSS: ↑ (3) |                                                        |              |              |              |              |              |
| <b>SELE</b>                            | <b>-0.25</b>                                                                        | <b>-0.37</b>                                           | <b>-0.16</b> | <b>-0.06</b> | <b>-0.26</b> | <b>-0.18</b> | <b>-0.07</b> |
|                                        | Adhesion molecule, E-selectin (12, 14, 17, 20). LSS: ↓ (3); DSS: ↑ (3)              |                                                        |              |              |              |              |              |
| <b>FOS</b>                             | <b>-0.24</b>                                                                        | <b>0.21</b>                                            | <b>0.21</b>  | <b>0.00</b>  | <b>-0.18</b> | <b>0.92</b>  | <b>-0.22</b> |
|                                        | c-fos gene, activating protein-1, inflammatory (2, 23)                              |                                                        |              |              |              |              |              |
| <b>JUN</b>                             | <b>-1.69</b>                                                                        | <b>-0.04</b>                                           | <b>0.17</b>  | <b>0.27</b>  | <b>0.26</b>  | <b>0.02</b>  | <b>0.08</b>  |
|                                        | c-jun gene, activating protein-1, inflammatory (2, 23). LSS: ↓ (15)                 |                                                        |              |              |              |              |              |
| <b>KLF2</b>                            | <b>1.81</b>                                                                         | <b>-0.13</b>                                           | <b>0.31</b>  | <b>0.76</b>  | <b>1.50</b>  | <b>1.51</b>  | <b>1.56</b>  |
|                                        | Inflammatory regulation transcription factor (19, 27, 31). LSS: ↑ (8, 27)           |                                                        |              |              |              |              |              |
| <b>KLF4</b>                            | <b>1.83</b>                                                                         | <b>0.14</b>                                            | <b>0.17</b>  | <b>0.45</b>  | <b>0.92</b>  | <b>1.17</b>  | <b>1.30</b>  |
|                                        | Inflammatory regulation transcription factor (13). LSS: ↑(13, 32)                   |                                                        |              |              |              |              |              |
| <b>BMP4</b>                            | <b>-2.17</b>                                                                        | <b>-0.10</b>                                           | <b>0.00</b>  | <b>-0.04</b> | <b>-0.32</b> | <b>-0.23</b> | <b>-0.17</b> |
|                                        | Activates inflammatory (16, 29). LSS: ↓ (4, 21); DSS: ↑ (3)                         |                                                        |              |              |              |              |              |
| <b>RELA</b>                            | <b>-0.11</b>                                                                        | <b>-0.05</b>                                           | <b>0.06</b>  | <b>-0.02</b> | <b>0.03</b>  | <b>0.07</b>  | <b>0.11</b>  |
|                                        | p65, NFκB (14, 17, 20)                                                              |                                                        |              |              |              |              |              |
| <b>NFKBIA</b>                          | <b>-1.31</b>                                                                        | <b>-0.07</b>                                           | <b>0.08</b>  | <b>0.01</b>  | <b>0.11</b>  | <b>0.10</b>  | <b>0.13</b>  |
|                                        | NFκB inhibitor, IκBα (14, 17, 20). LSS: ↓(30)                                       |                                                        |              |              |              |              |              |
| <b>IL8</b>                             | <b>0.95</b>                                                                         | <b>-0.63</b>                                           | <b>-0.54</b> | <b>-0.91</b> | <b>-0.80</b> | <b>-0.85</b> | <b>-0.87</b> |
|                                        | Inflammatory chemokine (14, 17, 20). LSS: ↑(5, 6)                                   |                                                        |              |              |              |              |              |
| <b>Vasomotion</b>                      |                                                                                     |                                                        |              |              |              |              |              |
| <b>NOS3</b>                            | <b>0.37</b>                                                                         | <b>0.19</b>                                            | <b>0.46</b>  | <b>0.52</b>  | <b>0.30</b>  | <b>0.38</b>  | <b>0.94</b>  |
|                                        | eNOS (7, 11). LSS: ↑ (8)                                                            |                                                        |              |              |              |              |              |
| <b>EDN1</b>                            | <b>-0.98</b>                                                                        | <b>0.00</b>                                            | <b>0.01</b>  | <b>0.11</b>  | <b>0.01</b>  | <b>-0.14</b> | <b>0.01</b>  |
|                                        | Endothelin-1 (11). LSS: ↓(10, 21)                                                   |                                                        |              |              |              |              |              |
| <b>Caveolin-1</b>                      | <b>-1.39</b>                                                                        | <b>-0.08</b>                                           | <b>-0.01</b> | <b>0.08</b>  | <b>-0.10</b> | <b>-0.25</b> | <b>-0.25</b> |
|                                        | Caveolin-1 (7, 11). LSS: ↓(4, 8, 21, 35)                                            |                                                        |              |              |              |              |              |
| <b>Oxidative state regulators</b>      |                                                                                     |                                                        |              |              |              |              |              |
| <b>SOD2</b>                            | <b>0.33</b>                                                                         | <b>-0.36</b>                                           | <b>-0.24</b> | <b>-0.51</b> | <b>-0.34</b> | <b>-0.27</b> | <b>-0.49</b> |
|                                        | cytoprotective, MnSOD (25). LSS: ↑ (8); DSS: ↓ (3)                                  |                                                        |              |              |              |              |              |
| <b>GADD45β</b>                         | <b>-0.68</b>                                                                        | <b>-0.32</b>                                           | <b>0.22</b>  | <b>0.48</b>  | <b>0.98</b>  | <b>0.61</b>  | <b>0.41</b>  |
|                                        | cytoprotective gene (25). LSS: ↑ (18) or slightly ↓ (25)                            |                                                        |              |              |              |              |              |
| <b>HMOX1</b>                           | <b>0.53</b>                                                                         | <b>-0.12</b>                                           | <b>0.08</b>  | <b>-0.13</b> | <b>0.12</b>  | <b>0.45</b>  | <b>0.77</b>  |
|                                        | anti-oxidative, cytoprotective and anti-inflammatory gene (22, 33). LSS: ↑ (21)     |                                                        |              |              |              |              |              |

1. Lock-In Amplifier Start-Up Kit: National Instrument, 2002.
2. **Ahmad M, Theofanidis P, and Medford RM.** Role of activating protein-1 in the regulation of the vascular cell adhesion molecule-1 gene expression by tumor necrosis factor-alpha. *J Biol Chem* 273: 4616-4621, 1998.
3. **Brooks AR, Lelkes PI, and Rubanyi GM.** Gene expression profiling of human aortic endothelial cells exposed to disturbed flow and steady laminar flow. *Physiological genomics* 9: 27-41, 2002.
4. **Chen BP, Li YS, Zhao Y, Chen KD, Li S, Lao J, Yuan S, Shyy JY, and Chien S.** DNA microarray analysis of gene expression in endothelial cells in response to 24-h shear stress. *Physiol Genomics* 7: 55-63, 2001.
5. **Cheng M, Li Y, Wu J, Nie Y, Li L, Liu X, Charoude HN, and Chen H.** IL-8 induces imbalances between nitric oxide and endothelin-1, and also between plasminogen activator inhibitor-1 and tissue-type plasminogen activator in cultured endothelial cells. *Cytokine* 41: 9-15, 2008.
6. **Cheng M, Liu X, Li Y, Tang R, Zhang W, Wu J, Li L, Liu X, Gang Y, and Chen H.** IL-8 gene induction by low shear stress: pharmacological evaluation of the role of signaling molecules. *Biorheology* 44: 349-360, 2007.
7. **Cunningham KS and Gotlieb AI.** The role of shear stress in the pathogenesis of atherosclerosis. *Lab Invest* 85: 9-23, 2005.
8. **Dekker RJ, van Soest S, Fontijn RD, Salamanca S, de Groot PG, VanBavel E, Pannekoek H, and Horrevoets AJ.** Prolonged fluid shear stress induces a distinct set of endothelial cell genes, most specifically lung Kruppel-like factor (KLF2). *Blood* 100: 1689-1698, 2002.
9. **DeMaio L, Tarbell JM, Scaduto RC, Jr., Gardner TW, and Antonetti DA.** A transmural pressure gradient induces mechanical and biological adaptive responses in endothelial cells. *Am J Physiol Heart Circ Physiol* 286: H731-741, 2004.
10. **Eskin SG, Turner NA, and McIntire LV.** Endothelial cell cytochrome P450 1A1 and 1B1: up-regulation by shear stress. *Endothelium* 11: 1-10, 2004.
11. **Feletou M and Vanhoutte PM.** Endothelial dysfunction: a multifaceted disorder (The Wiggers Award Lecture). *Am J Physiol Heart Circ Physiol* 291: H985-1002, 2006.
12. **Galkina E and Ley K.** Vascular adhesion molecules in atherosclerosis. *Arterioscler Thromb Vasc Biol* 27: 2292-2301, 2007.
13. **Hamik A, Lin Z, Kumar A, Balcells M, Sinha S, Katz J, Feinberg MW, Gerzsten RE, Edelman ER, and Jain MK.** Kruppel-like factor 4 regulates endothelial inflammation. *J Biol Chem* 282: 13769-13779, 2007.
14. **Hansson GK and Libby P.** The immune response in atherosclerosis: a double-edged sword. *Nat Rev Immunol* 6: 508-519, 2006.
15. **Himburg HA, Dowd SE, and Friedman MH.** Frequency-dependent response of the vascular endothelium to pulsatile shear stress. *Am J Physiol Heart Circ Physiol* 293: H645-653, 2007.
16. **Jo H, Song H, and Mowbray A.** Role of NADPH oxidases in disturbed flow- and BMP4- induced inflammation and atherosclerosis. *Antioxid Redox Signal* 8: 1609-1619, 2006.
17. **Libby P.** Inflammation in atherosclerosis. *Nature* 420: 868-874, 2002.
18. **Lin K, Hsu PP, Chen BP, Yuan S, Usami S, Shyy JY, Li YS, and Chien S.** Molecular mechanism of endothelial growth arrest by laminar shear stress. *Proceedings*

- of the National Academy of Sciences of the United States of America* 97: 9385-9389, 2000.
19. **Lin Z, Kumar A, SenBanerjee S, Staniszewski K, Parmar K, Vaughan DE, Gimbrone MA, Jr., Balasubramanian V, Garcia-Cardena G, and Jain MK.** Kruppel-like factor 2 (KLF2) regulates endothelial thrombotic function. *Circ Res* 96: e48-57, 2005.
  20. **Lusis AJ.** Atherosclerosis. *Nature* 407: 233-241, 2000.
  21. **McCormick SM, Eskin SG, McIntire LV, Teng CL, Lu CM, Russell CG, and Chittur KK.** DNA microarray reveals changes in gene expression of shear stressed human umbilical vein endothelial cells. *Proc Natl Acad Sci U S A* 98: 8955-8960, 2001.
  22. **Morse D and Choi AMK.** Heme oxygenase-1: from bench to bedside. *Am J Respir Crit Care Med* 172: 660-670, 2005.
  23. **Nagel T, Resnick N, Dewey CF, Jr., and Gimbrone MA, Jr.** Vascular endothelial cells respond to spatial gradients in fluid shear stress by enhanced activation of transcription factors. *Arterioscler Thromb Vasc Biol* 19: 1825-1834, 1999.
  24. **Novak L, Neuzil P, Pipper J, Zhang Y, and Lee S.** An integrated fluorescence detection system for lab-on-a-chip applications. *Lab Chip* 7: 27-29, 2007.
  25. **Partridge J, Carlsen H, Enesa K, Chaudhury H, Zakkar M, Luong L, Kinderlerer A, Johns M, Blomhoff R, Mason JC, Haskard DO, and Evans PC.** Laminar shear stress acts as a switch to regulate divergent functions of NF-kappaB in endothelial cells. *FASEB J* 21: 3553-3561, 2007.
  26. **Rasooly A and Herold KE.** *Biosensors and biodetection : methods and protocols.* New York: Humana Press, 2009.
  27. **SenBanerjee S, Lin Z, Atkins GB, Greif DM, Rao RM, Kumar A, Feinberg MW, Chen Z, Simon DI, Lusinskas FW, Michel TM, Gimbrone MA, Jr., Garcia-Cardena G, and Jain MK.** KLF2 is a novel transcriptional regulator of endothelial proinflammatory activation. *J Exp Med* 199: 1305-1315, 2004.
  28. **Shyy YJ, Hsieh HJ, Usami S, and Chien S.** Fluid shear stress induces a biphasic response of human monocyte chemoattractant protein 1 gene expression in vascular endothelium. *Proceedings of the National Academy of Sciences of the United States of America* 91: 4678-4682, 1994.
  29. **Sorescu GP, Song H, Tressel SL, Hwang J, Dikalov S, Smith DA, Boyd NL, Platt MO, Lassegue B, Griendling KK, and Jo H.** Bone morphogenetic protein 4 produced in endothelial cells by oscillatory shear stress induces monocyte adhesion by stimulating reactive oxygen species production from a Nox1-based NADPH oxidase. *Circ Res* 95: 773-779, 2004.
  30. **Sun H-W, Li C-J, Chen H-Q, Lin H-L, Lv H-X, Zhang Y, and Zhang M.** Involvement of integrins, MAPK, and NF-kappaB in regulation of the shear stress-induced MMP-9 expression in endothelial cells. *Biochem Biophys Res Commun* 353: 152-158, 2007.
  31. **van Thienen JV, Fledderus JO, Dekker RJ, Rohlena J, van Ijzendoorn GA, Kootstra NA, Pannekoek H, and Horrevoets AJ.** Shear stress sustains atheroprotective endothelial KLF2 expression more potently than statins through mRNA stabilization. *Cardiovasc Res* 72: 231-240, 2006.
  32. **Villarreal G, Zhang Y, Larman HB, Gracia-Sancho J, Koo A, and Garcia-Cardena G.** Defining the regulation of KLF4 expression and its downstream



transcriptional targets in vascular endothelial cells. *Biochem Biophys Res Commun* 391: 984-989.

33. **Wagener FADTG, Volk H-D, Willis D, Abraham NG, Soares MP, Adema GJ, and Figdor CG.** Different faces of the heme-heme oxygenase system in inflammation. *Pharmacol Rev* 55: 551-571, 2003.
34. **Yang B, Tan F, and Guan Y.** A collinear light-emitting diode-induced fluorescence detector for capillary electrophoresis. *Talanta* 65: 1303-1306, 2005.
35. **Zhao Y, Chen BPC, Miao H, Yuan S, Li Y-S, Hu Y, Roche DM, and Chien S.** Improved significance test for DNA microarray data: temporal effects of shear stress on endothelial genes. *Physiological genomics* 12: 1-11, 2002.
